# A case of pulmonary cryptococcosis followed by pleuritis in an apparently immunocompetent patient during fluconazole treatment

KOICHI IZUMIKAWA\*, YONG ZHAO\*, KOHEI MOTOSHIMA\*, TAKAHIRO TAKAZONO\*, TOMOMI SAIJO\*, SINTARO KURIHARA\*, SHIGEKI NAKAMURA\*, TAIGA MIYAZAKI\*, MASAFUMI SEKI\*, HIROSHI KAKEYA\*, YOSHIHIRO YAMAMOTO\*, KATSUNORI YANAGIHARA\*<sup>†</sup>, YOSHITSUGU MIYAZAKI\*, TOMAYOSHI HAYASHI<sup>‡</sup>, & SHIGERU KOHNO\*

\*Second Department of Internal Medicine, <sup>†</sup>Department of Laboratory Medicine, and <sup>‡</sup>Department of Pathology, Nagasaki University School of Medicine, Nagasaki, Japan

Cryptococcal pleuritis is rare in individuals with no underlying disease. We report a case of pulmonary cryptococcosis followed by pleuritis in a patient on fluconazole treatment. Biopsy of the pleura revealed a granuloma and a cryptococcal body, while PCR and sequence analysis of extracted DNA from the pleura proved the presence of *Cryptococcus* species, most likely *C. neoformans*. Voriconazole with flucytosine and drainage of the pleural effusion were effective in treating the patient.

**Keywords** Cryptococcus, pleuritis, fluconazole

## Introduction

While cryptococcosis in humans is found worldwide, it is rare in immunocompetent individuals and clinical manifestations of pulmonary infections in such patients are usually mild and asymptomatic [1]. However, cryptococcosis in immunocompromised hosts such as humans with immunodeficiency virus (HIV) infections and acquired-immunodeficiency syndrome (AIDS) patients, are more severe and clinical manifestations are more diverse [2].

Pulmonary inhalation of *Cryptococcus neoformans* is generally regarded as the route of infection in humans and pulmonary cryptococcosis may present with a wide variety of findings in chest X-ray films such as nodules, masses, pneumonia, and miliary lesions, but pleural disease is not common [3]. Although the frequency of cryptococcal pleuritis has increased recently because of

an increasing number of immunocompromised patients [4,5], it is still rare among immunocompetent cryptococcosis patients.

We report here a rare case of pulmonary cryptococcosis followed by pleuritis in an apparently immunocompetent patient during maintenance therapy with fluconazole.

## Case report

A 24-year-old male patient who primarily lived in Nagasaki, Japan, visited Nagasaki Municipal Hospital complaining of dry cough, right back pain and fever of two-week duration. He possessed no previous underlying diseases and no history of smoking or oral steroid use. He had visited Venice, Italy, three months prior to the onset of his symptoms, where he encountered large numbers of pigeons, but had no history of breeding the birds. Chest X-ray films revealed infiltrative shadows with cavitation in the right lower lung field (Fig. 1). Since his serum cryptococcal antigen level was high ( $\times 1024$ ), he was diagnosed as having pulmonary cryptococcosis and was referred to Nagasaki University Hospital for further treatment.

On admission, vital signs of the patient were as follows: body temperature of 36.5°C; heart rate of

Received 11 October 2007; Final revision received 18 March 2008; Accepted 24 March 2008

Correspondence: Koichi Izumikawa, Second Department of Internal Medicine, Nagasaki University School of Medicine, 1-7-1 Sakamoto, Nagasaki 852-8501, Japan. Tel: +81 95 819 7276; Fax: +81 95 849 7285; E-mail: koizumik@nagasaki-u.ac.jp

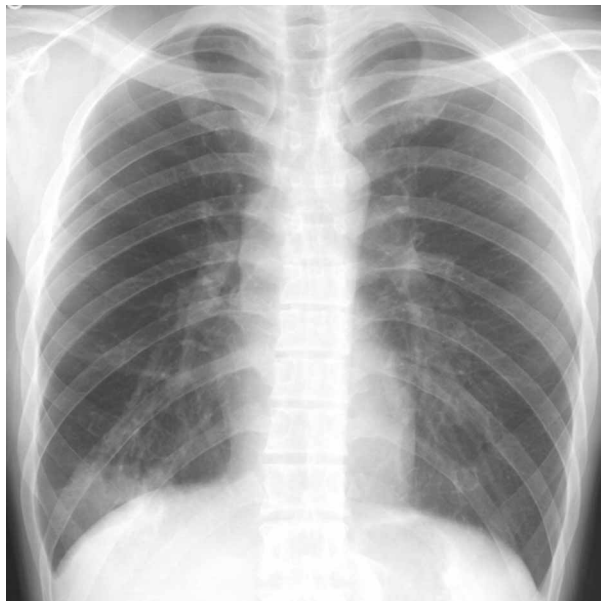

**Fig. 1** Chest X-ray film on first admission demonstrating infiltrative shadows with cavitation in the right lower lung field.

76 beats/min with a regular rhythm; a respiratory rate of 14 breaths/min; and his blood pressure was 111/65 mmHg. Physical examination revealed no rales or murmurs and no signs of systemic lymphadenopathy, hepatosplenomegaly, or pre-tibial edema. There were no abnormalities on neurological examination such as neck stiffness or disorientation. Laboratory findings on admission were: white blood cells count =  $8.9 \times 10^3/\mu\text{l}$  with a shift to the left (neutrophils of 73%); C-reactive protein (CRP) = 1.99 mg/dl; and erythrocyte sedimentation rate = 38 mm/h. Sputum microbiology testing revealed no potential causative bacteria or *Cryptococcus* spp. Bronchoscopy and bronchial alveolar lavage (BAL) were performed. India ink staining of BAL fluid (BALF) revealed encapsulated yeast-like cells and a high cryptococcal antigen ( $\times 64$ ) titer. Lumbar puncture, performed to rule out cephalomeningitis, demonstrated a clear and colorless recall. India ink staining showed no causative agents and the cryptococcal antigen test was negative.

Since the patient's cough was persistent and severe, liposomal amphotericin B (L-AMB) was administered intravenously. Within ten days of L-AMB administration, the patient improved symptomatically and the chest X-ray and CRP also showed improvement. Nausea and loss of appetite, however, occurred eight days after initiation of treatment and serum potassium levels decreased to 3.1 mEq/ml, apparently as side

effects of L-AMB. The decision was made to discontinue L-AMB and instead, oral treatment with 400 mg/day of fluconazole (FLC) was initiated. Six months administration of oral FLC on an outpatient basis was planned and the patient was discharged from the hospital.

Fourteen days after discharge, the patient was re-admitted to our hospital, again with the same symptoms of dry cough, back pain and fever. Chest X-ray films revealed a new right pleural effusion with original infiltrative shadow in the right lower lung field. Physical examination and laboratory findings were almost identical to those of his previous admission. However, this time CRP level was elevated to 5.17 mg/dl. On admission, aspiration of the pleural effusion was performed. Aspirated fluid was slightly bloody in appearance with elevated levels of albumin (2.9 mg/dl) and lactate dehydrogenase (444 IU/dl), indicating that the effusion was exudative rather than transudative in nature, probably due to inflammation. Total cell counts of the fluid were  $6.1 \times 10^6/\text{ml}$ , consisting of 13% eosinophilic cells, although there was no evidence of eosinophilia in the blood. Cryptococcal antigen level of the pleural effusion was also high ( $\times 256$ ). The results indicated that the effusion was a complication of pulmonary cryptococcosis and hence, intravenous itraconazole (ITC) 200 mg/day replaced FLC in treating the patient.

However, 13 days after initiation of ITC, CRP level was elevated to 9.41 mg/dl, fever persisted and there had been an increase of the pleural effusion (Fig. 2). The second analysis of the aspirated fluid revealed that the effusion was exudative with no eosinophilic cells being present. No bacteria or *Cryptococcus* spp. were isolated in culture. L-AMB, 200 mg/day, was once again administered instead of ITC, with no decrease in pleural effusion or fever. Seven days after administration of L-AMB, pleural biopsy under video-assisted thoracoscopy (VATS) was performed in order to examine the etiology of the effusion. Pathological findings of pleura showed fibrin and foreign-body granuloma. Multiple yeast-like fungal bodies were observed in the inflammatory granuloma by periodic acid Schiff and Grocott staining (Fig. 3). Drainage of the pleural effusion was performed and a combination of 400 mg/day voriconazole (VRC) and 6 g/day flucytosine (5FC) were administered orally instead of L-AMB. Fever and cough gradually improved and CRP level also normalized within three weeks of the initiation of this combination therapy. Both the

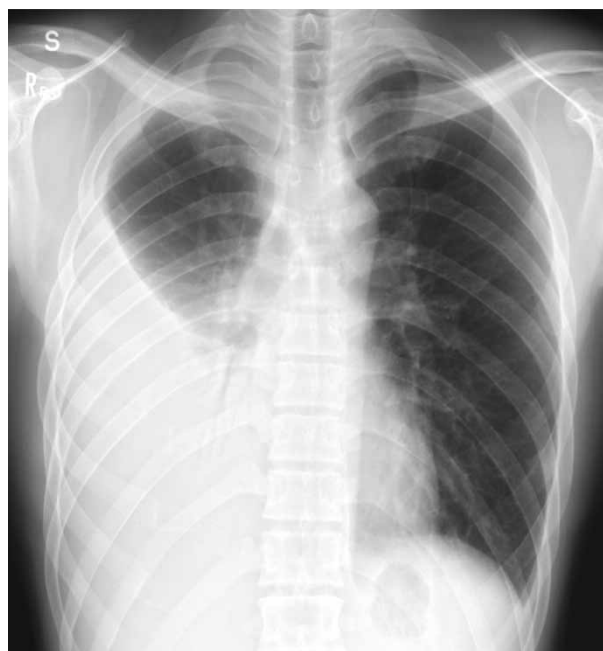

**Fig. 2** Chest X-ray film during second admission. Massive pleural effusion is indicated in the right thorax with infiltrates in the right lower lung field.

antifungal drugs were continued for five months after discharge with no clinical recurrence of the disease.

PCR analysis using extracted DNA from the pleura obtained under VATS was performed to identify the causative agent. Extraction of DNA from paraffin-embedded pleura was in accord, with minor modification, with the method previously reported [6]. Briefly, five sections (thickness, 10  $\mu$ m) of the specimen, cut with a sterile microtome blade, were used in the extraction procedure. To remove paraffin wax, xylene

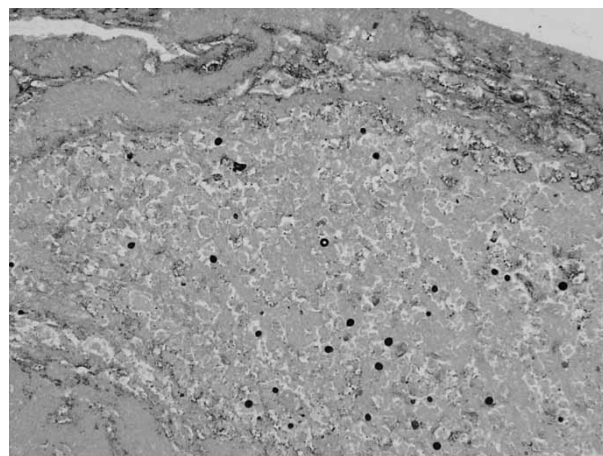

**Fig. 3** Pathological finding of the pleural tissue obtained by VATS. Typical yeast-form fungus bodies are seen. (Grocott stain,  $\times 400$ ).

was added, mixed, incubated at room temperature for 10 min, and centrifuged (at 15,000 rpm for 5 min). The pellet was washed three times with ethanol, dried at room temperature and suspended in distilled water. Further extraction was performed by mechanical disruption by the glass bead technique as previously reported [7]. PCR was performed based on the protocol previously reported by Leaw *et al.* [8]. The universal fungal primers ITS1 (5'-TCCGTAGGTGAACCTGGG-3') and ITS2 (5'-GCTGCGTTCTTCATCGATGC-3') were employed to amplify the internal transcribed spacer 1 (ITS1) region and 52 bp from the 5' end of the 5.8S gene, as well as about 30 bp from the 3' end of the 18S gene [9]. PCR was performed in a total reaction volume of 50  $\mu$ l of premix Taq (Takara, Tokyo, Japan), with 0.4  $\mu$ M each of primers ITS1 and ITS2, and DNA template. PCR was carried out using the following steps; initial denaturation at 94°C for 3 min, 30 cycles of denaturation (94°C for 1 min), annealing (60°C for 1 min), extension (72°C for 1 min) and a final extension step at 72°C for 3 min. In the PCR analysis, a 202-bp band was amplified from DNA extracted from pleura and gDNA extracted from the H99 *Cryptococcus neoformans* reference strain. The PCR product was then purified by PCR purification kit (Stratagene, La Jolla, CA, USA) and cloned into the TA cloning vector with a TA cloning kit (Qbiogene, Irvine, CA, USA). The cloned PCR product was sequenced with both M13 and Reverse sequencing primers twice and the acquired sequence chromatograms by ABI prism 310 Genetic analyzer (Applied Biosystems, Foster City, CA, USA) were carefully assessed and corrected by investigators. The ITS1 region (121 bp) of the cloned PCR product was compared to the NCBI nucleotide database using nucleotide-nucleotide BLAST with default setting, except that the sequences were not filtered for low complexity [10]. The BLAST search resulted in 100% match across all 121 bp to the ITS1 sequence of *C. neoformans* var. *neoformans* JEC 21 (Genbank accession number AY217025) (Fig. 4). The sequence differed from that of *C. neoformans* var. *grubii* (H99 strain; Genbank accession number AY217027) by two nucleotides at the discriminatory positions 19 and 108 of the ITS1 region (Fig. 4) [11]. The sequence also differed from that of *C. gattii* (formerly *C. neoformans* var. *gattii*; Genbank accession number EF081159) by four nucleotides at the discriminatory positions 11, 15, 19 and 108 of the ITS1 region (Fig. 4) [11]. These results indicate that the pleuritis was probably caused by *Cryptococcus* species, most likely *C. neoformans* var. *neoformans*.

|                                    |  |            |            |            |            |            |            |   |
|------------------------------------|--|------------|------------|------------|------------|------------|------------|---|
|                                    |  | 10         | 20         | 30         | 40         | 50         | 60         |   |
| Sample                             |  | GTAGAGAATA | TTGGACTTTG | GTCCATTAT  | CTACCCATCT | ACACCTGTGA | ACTGTTTATG |   |
| AY217025 (var. <i>neoformans</i> ) |  | GTAGAGAATA | TTGGACTTTG | GTCCATTAT  | CTACCCATCT | ACACCTGTGA | ACTGTTTATG |   |
| AY217027 (var. <i>grubii</i> )     |  | GTAGAGAATA | TTGGACTTCG | GTCCATTAT  | CTACCCATCT | ACACCTGTGA | ACTGTTTATG |   |
| EF081159 ( <i>C. gatti</i> )       |  | GTAGAGAATA | CTGGGCTTCG | GTCCATTAT  | CTACCCATCT | ACACCTGTGA | ACTGTTTATG |   |
|                                    |  |            | * * *      |            |            |            |            |   |
|                                    |  | 70         | 80         | 90         | 100        | 110        | 120        |   |
| Sample                             |  | TGCTTCGGCA | CGTTTTACAC | AAACTTCTAA | ATGTAATGAA | TGTAATCATA | TTATAACAAT | A |
| AY217025 (var. <i>neoformans</i> ) |  | TGCTTCGGCA | CGTTTTACAC | AAACTTCTAA | ATGTAATGAA | TGTAATCATA | TTATAACAAT | A |
| AY217027 (var. <i>grubii</i> )     |  | TGCTTCGGCA | CGTTTTACAC | AAACTTCTAA | ATGTAATGAA | TGTAATCTTA | TTATAACAAT | A |
| EF081159 ( <i>C. gatti</i> )       |  | TGCTTCGGCA | CGTTTTACAC | AAACTTCTAA | ATGTAATGAA | TGTAATCTTA | TTATAACAAT | A |
|                                    |  |            |            |            |            | *          |            |   |

**Fig. 4** Alignment of ITS1 sequences of the sample from the patient, *Cryptococcus neoformans* var. *neoformans* JEC 21 (Genbank accession number AY217025), *Cryptococcus neoformans* var. *grubii* (H99 strain; Genbank accession number AY217027) and *Cryptococcus gattii* (formerly *Cryptococcus neoformans* var. *gattii*; Genbank accession number EF081159). The asterisks indicate the nucleotides difference in alignments of all sequences. The sequence of ITS1 of clinical sample was 100% match across all 121 bp to that of *Cryptococcus neoformans* var. *neoformans* JEC 21 (Genbank accession number AY217025). The sequence differed from those of *Cryptococcus neoformans* var. *grubii* (H99 strain; Accession number AY217027) and *Cryptococcus gattii* (formerly *Cryptococcus neoformans* var. *gattii*; Accession number EF081159) by two (discriminatory positions 19 and 108 in the ITS1 region) and four (discriminatory positions 11, 15, 19 and 108 in the ITS1 region) nucleotides, respectively.

## Discussion

Pleural diseases due to fungi are rare, with the reported frequency being about 1% of all pleural diseases [12]. Before the HIV/AIDS era, pleural effusions due to *C. neoformans* were extremely rare, but recently, the frequency has reportedly increased to from 5–25% [4,5]. More than half of the patients have moderate to severe underlying diseases such as AIDS, leukemia and lymphoma [13]. However, cryptococcal pleuritis still remains uncommon in patients without underlying diseases. Our patient was a 24-year-old previously healthy man with no known predisposing conditions.

Another uncommon occurrence in our patient was that the pleural effusion gradually increased during treatment with L-AMB, as well as with FLC. It is very rare for pleural effusion to increase during treatment in immunocompetent hosts. Direct extension of the primary pulmonary cryptococcal nodule into the pleural space causes pleural cryptococcosis [14], with exudative effusions. Though laboratory findings demonstrated the exudative nature of the effusion in our case, eosinophils were elevated in the first aspirate. There are reports that eosinophils are increased in cryptococcal pleuritis [13,15], but the mechanism is not quite understood. The diagnosis of cryptococcal pleuritis requires proof of the presence of *Cryptococcus* spp. in the effusion or its recovery in pleural culture.

Since all attempts to recover the etiologic agent from sputum, BALF, and pleural effusion of our patient failed, we performed PCR to detect fungal DNA extracted from the pleura obtained by VATS. Identifi-

cation of yeast species by sequence analysis of ITS regions was established by Leaw *et al.* [8] and we analyzed the total of 121 bp of ITS1 region. The result revealed that the presence of *Cryptococcus* spp. in the pleura of our patient. Since the ITS1 region is highly conserved among *Cryptococcus* spp., a complete identification of the causative organism was not possible. However the high level of nucleotide identity of the sequence to *C. neoformans* sequences, suggests that this species was most likely the cause of the pleuritis. Recently described molecular methods enable the identification of *Cryptococcus* species, varieties and/or serotypes, by sequencing the entire ITS1-5.8S-ITS2 region [11], or multiplex PCR of the laccase and capsule genes [16]. However, our attempts to replicate these methodologies failed due to unknown reasons.

Although cryptococcal pleuritis sometimes resolves without medication especially in immunocompetent hosts [12], drainage and administration of VRC and 5FC were required in our patient. A total of five months treatment of VRC and 5FC was effective, with no recurrence being observed after discontinuation of drug therapy. As *Cryptococcus* was never isolated from sputum, BALF, or pleural effusion, we were not able to perform drug susceptibility tests. It is possible that the strain that was responsible for symptoms in our patient might have been resistant to older generations of azoles.

In conclusion, we experienced a rare case of cryptococcal pleuritis in an apparently immunocompetent host, who deteriorated during FLC treatment.

Drainage of the pleural effusion and combination therapy of VRC and 5FC treatment were effective.

**Declaration of interest:** The authors report no conflicts of interest. The authors alone are responsible for the content and writing of the paper.

## References

- 1 Kuykendall SJ, Ellis FH Jr, Weed LA, Donoghue FE. Pulmonary cryptococcosis. *N Engl J Med* 1957; **257**: 1009–1016.
- 2 Sugar AM. Overview: cryptococcosis in the patient with AIDS. *Mycopathologia* 1991; **114**: 153–157.
- 3 Patz EF Jr, Goodman PC. Pulmonary cryptococcosis. *J Thorac Imaging* 1992; **7**: 51–55.
- 4 Cadranel JL, Chouaid C, Denis M, *et al.* Causes of pleural effusion in 75 HIV-infected patients. *Chest* 1993; **104**: 655.
- 5 Chechani V, Kamholz SL. Pulmonary manifestations of disseminated cryptococcosis in patients with AIDS. *Chest* 1990; **98**: 1060–1066.
- 6 Goelz SE, Hamilton SR, Vogelstein B. Purification of DNA from formaldehyde fixed and paraffin embedded human tissue. *Biochem Biophys Res Commun* 1985; **130**: 118–126.
- 7 Tanaka K, Miyazaki T, Maesaki S, *et al.* Detection of *Cryptococcus neoformans* gene in patients with pulmonary cryptococcosis. *J Clin Microbiol* 1996; **34**: 2826–2828.
- 8 Leaw SN, Chang HC, Sun HF, *et al.* Identification of medically important yeast species by sequence analysis of the internal transcribed spacer regions. *J Clin Microbiol* 2006; **44**: 693–699.
- 9 White TJ, Bruns T, Lee S, Taylor J. Amplification and direct sequencing of fungal ribosomal RNA genes for phylogenetics. In: Innis MA, Gelfand DH, Sninsky JJ, White TJ, (eds.) *PCR Protocols: A Guide to Methods and Applications*. San Diego: Academic Press; 1990. pp 315–322.
- 10 Altschul SF, Gish W, Miller W, *et al.* Basic local alignment search tool. *J Mol Biol* 1990; **215**: 403–410.
- 11 Katsu M, Kidd S, Ando A, *et al.* The internal transcribed spacers and 5.8S rRNA gene show extensive diversity among isolates of the *Cryptococcus neoformans* species complex. *FEMS Yeast Res* 2004; **4**: 377–388.
- 12 Light RW. Pleural effusion secondary to fungal infections, actinomycosis, and nocardiosis. In: Light RW, (ed.) *Pleural Diseases*. 4th ed. Philadelphia: Lippincott Williams & Wilkins; 2001. pp 196–203.
- 13 Young EJ, Hirsh DD, Fainstein V, Williams TW. Pleural effusions due to *Cryptococcus neoformans*: a review of the literature and report of two cases with cryptococcal antigen determinations. *Am Rev Respir Dis* 1980; **121**: 743–747.
- 14 Salyer WR, Salyer DC. Pleural involvement in cryptococcosis. *Chest* 1974; **66**: 139–140.
- 15 Nei T, Enomoto T, Sakamoto T, *et al.* A case of secondary pulmonary cryptococcosis with pleural effusion involving type I allergy. *Nihon Kokyuki Gakkai Zasshi* 2007; **45**: 551–555.
- 16 Ito-Kuwa S, Nakamura K, Aoki S, Vidotto V. Serotype identification of *Cryptococcus neoformans* by multiplex PCR. *Mycoses* 2007; **50**: 277–281.

This paper was first published online on iFirst on 7 May 2008.
